# Supplementary material for: Enhancing cancer immunotherapy: Nanotechnology-mediated immunotherapy overcoming immunosuppression
Source: PubMed Central journal article supplement — Acta Pharm Sin B. 2024 Jun 3;14(9):3834–54. doi: 10.1016/j.apsb.2024.05.032 (PMC11413684; doi:10.1016/j.apsb.2024.05.032), 2024-06-03
Supplement: mmc1.pdf [file mmc1.pdf]

## Supporting Information for

## REVIEW

# Enhancing cancer immunotherapy: Nanotechnology-mediated immunotherapy overcoming immunosuppression

Yunna Chen<sup>a,†</sup>, Qianqian Zhou<sup>b,c,†</sup>, Zongfang Jia<sup>b,c</sup>, Nuo Cheng<sup>b,c</sup>, Sheng Zhang<sup>a</sup>, Weidong Chen<sup>b,c,\*</sup>, Lei Wang<sup>b,c,\*</sup>

<sup>a</sup>*Key Laboratory of Molecular Biology (Brain diseases), Anhui University of Chinese Medicine, Hefei 230012, China*

<sup>b</sup>*MOE-Anhui Joint Collaborative Innovation Center for Quality Improvement of Anhui Genuine Chinese Medicinal Materials, Hefei 230012, China*

<sup>c</sup>*Anhui Province Key Laboratory of Chinese Medicinal Formula, Hefei 230012, China*

Received 22 March 2024; received in revised form 12 May 2024; accepted 24 May 2024

\*Corresponding authors.

E-mail addresses: wdchen@ahtcm.edu.cn (Weidong Chen), wanglei@ahtcm.edu.cn (Lei Wang).

<sup>†</sup>These authors made equal contributions to this work.

**Table S1** Summary of nanomedicine overcoming tumor immunosuppression.

| Target | Nanomedicine               | Classification                        | Advantage and unique characteristic                                                                | Mechanism                                                                                                                                                 | Cancer                 | Ref |
|--------|----------------------------|---------------------------------------|----------------------------------------------------------------------------------------------------|-----------------------------------------------------------------------------------------------------------------------------------------------------------|------------------------|-----|
|        | HA-PeiPLGA-MTX NPs         | Polymer nanoparticle                  | Targeted malignant breast cells                                                                    | NF- $\kappa$ B signaling was inhibited and TAMs shifted to M1 phenotype                                                                                   | 4T1 mouse model        | 1   |
|        | PHNPs@DPA-S-S-B SA-MA@3-MA | Inorganic nanoparticle                | GSH-responsive, targeted TAMs                                                                      | Nanoparticles activate NF- $\kappa$ B p65 and promote the polarization of TAMs into M1 type macrophages                                                   | MDA-MB-231 mouse model | 2   |
|        | P/ML-NNG                   | Nanogel                               | MMP2-responsive, targeted T cells, and targeted TAMs                                               | P/ML-NNG can release drugs to different targets and simultaneously inhibit PD-1/PD-L1 and NF- $\kappa$ B pathway, thereby repolarizing M2 TAMs to M1 TAMs | B16 mouse model        | 3   |
| TAMs   | LDH@155 nanoparticles      | Layered double hydroxide nanoparticle | Endosomal escape, regulate the expression of pro-inflammatory factors, and costimulatory molecules | LDH@155 nanoparticles effectively activated NF- $\kappa$ B expression in TAMs, and induced polarization of TAMs towards M1 phenotype                      | TC-1 mouse model       | 4   |

|                                 |                        |                                                        |                    |                                                                                                                                                               |                       |
|---------------------------------|------------------------|--------------------------------------------------------|--------------------|---------------------------------------------------------------------------------------------------------------------------------------------------------------|-----------------------|
|                                 |                        | in MDSCs.                                              |                    |                                                                                                                                                               |                       |
| IL-12/ $\alpha$ -TOS loaded TRN | Inorganic nanoparticle | Good biocompatibility, degradability, and sensitivity  | solubility, and pH | Microenvironment responsive nanocarriers release IL12 and promote the repolarization of TAMs into M1 phenotype.                                               | 4T1 mouse model 5     |
| TNPs                            | Polymer nanoparticle   | No toxicity and release                                | responsive         | The released IL-12 promoted the polarization of TAMs into M1 phenotype.                                                                                       | HepG2 mouse model 6   |
| BLZ945/Sel NPs                  | Lipid nanoparticle     | Stability, internalization in macrophages, and release | higher in M2       | Supramolecular nanoparticles continuously inhibit both CSF1R and MAPK signaling pathways, promoting the repolarization of M2 macrophages to the M1 phenotype. | 4T1 mouse model 7     |
| $\alpha$ -PDL1-CSF-LNPs         | Lipid nanoparticle     | Biocompatibility, tethering, and loading capacity      | antibody           | $\alpha$ -PDL1-CSF-LNPs can simultaneously target and inhibit the PDL1 and CSF1R pathways, thereby promoting the transformation of M2 phenotype into M1       | B16/F10 mouse model 8 |

---

|                    |                              |                                                                |                      |                                                                                                                                                                                   |                 |    |
|--------------------|------------------------------|----------------------------------------------------------------|----------------------|-----------------------------------------------------------------------------------------------------------------------------------------------------------------------------------|-----------------|----|
|                    |                              |                                                                |                      | phenotype.                                                                                                                                                                        |                 |    |
| P/T@MM NPs         | Polymer nanoparticle         | Actively targeting the tumor site and immune escape            |                      | Biomimetic nanoparticles repolarises M2 macrophages into M1 macrophages by altering their epigenetic properties                                                                   | breast cancer   | 9  |
| R848@LNPs          | Polymer nanoparticle         | Targeted M2 macrophages, biocompatibility and biodegradability |                      | R848@LNPs can target CD206 positive M2 like TAMs and convert them into anti-tumor M1 macrophages.                                                                                 | 4T1 mouse model | 10 |
| Iron nanoparticles | oxide Inorganic nanoparticle | Hemolysis                                                      |                      | Iron oxide nanoparticles differentiate M2 like TAMs into M1 phenotypes                                                                                                            | LLC mouse model | 11 |
| MIX-NPs            | Polymer nanoparticle         | pH-responsive, separation, targeting of TAMs and cancer cells  | core-shell selective | Twin-like charge-switchable nanoparticles selectively silence MFN1, thereby inhibiting mitochondrial fusion in TAMs and promoting repolarization of TAMs from M2 to M1 phenotype. | 4T1 mouse model | 12 |
| DMSN-PEI@125a      | Inorganic nanoparticle       | Large pore size, volume, high surface areas, and               |                      | DMSN-PEI@125a bind to the 3'- untranslated region of targeted mRNA and                                                                                                            | TC-1 mouse      | 13 |

|                          |                        |                                                                            |                                                                                                                                                                                                 |                     |    |
|--------------------------|------------------------|----------------------------------------------------------------------------|-------------------------------------------------------------------------------------------------------------------------------------------------------------------------------------------------|---------------------|----|
|                          |                        | protecting gene stability                                                  | repolarize TAMs.                                                                                                                                                                                | model               |    |
| CuPP                     | Nanoenzyme             | High physiological stability, tunable enzyme-like activities, and low cost | CuPP promotes the transition of M2 macrophages to M1 macrophages by increasing the O <sub>2</sub> level in TME.                                                                                 | 4T1 mouse model     | 14 |
| OX40L M1-exos            | Exosomes               | Immune evasion, participate in intercellular communication                 | OX40L M1-exos promoted the reprogramming of TAMs into M1 macrophages by activating the OX40/OX40L pathway                                                                                       | 4T1 mouse model     | 15 |
| PTEN mRNA NPs            | Polymer nanoparticle   | Protecting gene stability                                                  | PTEN mRNA nanoparticles promote the permeation of CD8 <sup>+</sup> T cells in tumor tissues and reverse TIME.                                                                                   | B16-F10 mouse model | 16 |
| T cells                  |                        |                                                                            |                                                                                                                                                                                                 |                     |    |
| Biomimetic nanoparticles | Inorganic nanoparticle | Homologous adhesion, crossing the blood-brain barrier                      | The combination of biomimetic nanoparticles and PX reduced PD-1 and TIM-3 on T cells by downregulating TET2 expression, and inhibited GRK2 for stabilizing S1PR1 expression on T cells surface. | GL261 mouse model   | 17 |

|       |                                  |                            |                                                                  |                                                                                                                                                                                                                                            |                             |    |
|-------|----------------------------------|----------------------------|------------------------------------------------------------------|--------------------------------------------------------------------------------------------------------------------------------------------------------------------------------------------------------------------------------------------|-----------------------------|----|
|       | FeS-GOx@PTX                      | Self-assembly nanoparticle | High tumor permeability and low toxicity                         | FeS-GOx@PTX can promote T cell infiltration and completely eliminate primary tumors by inducing ICD.                                                                                                                                       | 4T1 mouse model             | 18 |
|       | PLGA-ICG                         | Polymer nanoparticle       | Biocompatible, biodegradable, low toxicity and sustained release | PLGA-ICG disrupts ECM by generating heat, thereby increasing the infiltration of CAR T cells.                                                                                                                                              | WM115 mouse model           | 19 |
|       | VNP <sub>siLdha</sub>            | Lipid nanoparticle         | Protecting gene stability and preventing premature gene release  | VNP <sub>siLdha</sub> neutralize tumor acidity by reducing lactate production, thereby restoring T cells function.                                                                                                                         | B16-F10 and 4T1 mouse model | 20 |
|       | CD-MnOx@CM                       | Inorganic nanoparticle     | Biocompatibility, catalytic ability, and targeted tumor cells    | CD-MnOx@CM not only effectively activated CD8 <sup>+</sup> T cells, but also regulated ROS levels in TME by catalyzing the decomposition of H <sub>2</sub> O <sub>2</sub> into O <sub>2</sub> within the tumor to promote T cell survival. | B16-F10 mouse model         | 21 |
| Tregs | Fluorine-assembled nanoparticles | Inorganic nanoparticle     | Redox and photodynamic effect                                    | Fluorine-assembled nanoparticles reversed Tregs mediated immunosuppression by                                                                                                                                                              | 4T1 mouse model             | 22 |

---

|                                           |                                |                                                            |                                                                                                                                                         |                     |    |
|-------------------------------------------|--------------------------------|------------------------------------------------------------|---------------------------------------------------------------------------------------------------------------------------------------------------------|---------------------|----|
|                                           |                                |                                                            | alleviating hypoxia and reducing GSH content.                                                                                                           |                     |    |
| tLyp1-CH NPs                              | Polymer nanoparticle           | Stability and targeted Tregs                               | tLyp1 peptide coupled hybrid nanoparticles inhibited the phosphorylation of STAT3 and STAT5, reducing Tregs within the tumors.                          | B16 mouse model     | 23 |
| Supramolecular photodynamic nanoparticles | Cyclodextrin inclusion complex | Reduce phototoxicity and responsive release                | Supramolecular photodynamic nanoparticles can reduce Tregs levels and increase infiltration of CD8 <sup>+</sup> T cells in TME, thereby reversing TIME. | 4T1 mouse model     | 24 |
| LBL-hNPs                                  | Polymer nanoparticle           | Photothermal effect, photodynamic effect, and pH-sensitive | LBL-hNPs reduced the inhibitory function of Tregs and improved the anti-tumor efficiency of PDT                                                         | B16/BL6 mouse model | 25 |
| Cur NPs                                   | Polymer nanoparticle           | High bioavailability and safety                            | Curcumin nanoparticles inhibited MEK/ERK signaling and effectively reduced the increase of Tregs in tumors.                                             | 4T1 mouse model     | 26 |
| UA liposomes                              | Liposome                       | Improve solubility, extend                                 | UA liposomes can reduce tumor site Tregs                                                                                                                | 4T1 mouse           | 27 |

---

|        |                    |       |                        |                                                            |     |                                                                                              |                            |    |
|--------|--------------------|-------|------------------------|------------------------------------------------------------|-----|----------------------------------------------------------------------------------------------|----------------------------|----|
|        |                    |       |                        | half-life, and non-toxic                                   |     | by inhibiting STAT5 phosphorylation and IL-10 secretion.                                     | model                      |    |
|        | Iron nanoparticles | oxide | Inorganic nanoparticle | Biodegradation photothermal effect                         | and | Iron oxide nanoparticles-mediated PTT can preferentially eliminate Tregs at the tumor sites. | 4T1 mouse model            | 28 |
| MDS Cs | HDL NPs            |       | Inorganic nanoparticle | Targeted MDSCs                                             |     | HDL NPs significantly inhibited the activity of MDSCs and inhibited tumor growth.            | B16F10 and LLC mouse model | 29 |
|        | FIT NPs            |       | Inorganic nanoparticle | Efficient drug loading, TME responsive, and Targeted MDSCs |     | FIT NPs can enhance the efficacy of PTT by inducing ICD and reducing the function of MDSCs.  | CT26 mouse model           | 30 |



---

|                    |                        |                                                                     |                                                                                                                                                       |                    |    |
|--------------------|------------------------|---------------------------------------------------------------------|-------------------------------------------------------------------------------------------------------------------------------------------------------|--------------------|----|
|                    |                        |                                                                     | The nanoplatfrom overcomed tumor hypoxia by inhibiting mitochondrial respiration, thereby inhibiting the immunosuppressive function induced by MDSCs. | B16F10 mouse model | 31 |
| IR780/Met NPs      | Inorganic nanoparticle | Control release effect, large pore size, and produce O <sub>2</sub> |                                                                                                                                                       |                    |    |
| R-mPDV/PDV/DOX/siL | Polymer nanoparticle   | Redox reaction, Lysosome escape, and targetability                  | R-mPDV/PDV/DOX/siL efficiently silence LDHA expression and induce ICD.                                                                                | 4T1 mouse model    | 32 |
| LPPR               | Polymer nanoparticle   | Extend half-life, reduce toxicity, and improve stability            | LPPR can increase cytotoxic T cells infiltration and reduce immunosuppressive cells recruitment by inhibiting TAFs activation <i>in vivo</i> .        | 4T1 mouse model    | 33 |
| TAFs               |                        |                                                                     |                                                                                                                                                       |                    |    |
| DMSN@MIPs          | Inorganic nanoparticle | Large pore size, volume, and high surface areas                     | DMSN@MIPs inhibited the activation of TAFs and increased the levels of immune cells (DCs, CD8 <sup>+</sup> T cells, and NK cells) .                   | 4T1 mouse model    | 34 |
| PMs-Ba             | Polymer                | Long cycle characteristics,                                         | PMs-Ba increased cytotoxic T cells                                                                                                                    | 4T1 mouse          | 35 |

---

|                             |                          |                                                                                                                   |                                                                                                                                                                                          |                            |    |
|-----------------------------|--------------------------|-------------------------------------------------------------------------------------------------------------------|------------------------------------------------------------------------------------------------------------------------------------------------------------------------------------------|----------------------------|----|
|                             | nanoparticle             | low toxicity, and biocompatibility                                                                                | infiltration and stimulated the tumor immune microenvironment by inhibiting TAFs activation.                                                                                             |                            |    |
| PEG-SAB-Lip                 | Liposome                 | Long cycle characteristics, low toxicity, and biocompatibility                                                    | PEG-SAB-Lip can remodel the tumor fibrotic microenvironment and increase the infiltration of CD4 <sup>+</sup> , CD8 <sup>+</sup> T cells, and M1 macrophage.                             | 4T1 mouse model            | 36 |
| Self-adaptive nanoregulator | Micella                  | Adjustable form and ROS-responsive release                                                                        | The self-adaptive nanoregulator interfered with tumor fibrosis and IDO1-kyurenine axis induced T cells failure by delivering TAFs inhibitor and indoleamine 2,3-dioxygenase 1 inhibitor. | Panc02 and KPC mouse model | 37 |
| Biomimetic nanoparticles    | Solid lipid nanoparticle | Simultaneously targeting cancer cells and TAFs, immune evasion, long-term circulation and tumor-homing capability | Biomimetic nanoparticles simultaneously blocked the glycolysis of cancer cells and TAFs, reduced lactate production in TME, and activated immune responses.                              | 4T1 mouse model            | 38 |

|          |                |                            |                                                  |                                                                                                                                        |                         |    |
|----------|----------------|----------------------------|--------------------------------------------------|----------------------------------------------------------------------------------------------------------------------------------------|-------------------------|----|
| NK cells | Gal/IL-15@CaLN | Inorganic nanoparticle     | Biocompatibility and acid-responsive release     | Gal/IL-15@CaLN enhance T cells immunity by activating NK cells.                                                                        | CT26 mouse model        | 39 |
|          | SCND-SIS3      | Self-assembly nanoparticle | Bioavailability and biocompatibility             | SCND-SIS3 enhance NK cell-mediated immune response by inhibiting Smad3-mediated Ndrgr1 transcription.                                  | LLC mouse model         | 40 |
|          | STING-LNPs     | Lipid nanoparticle         | Long-term circulation and biocompatibility       | STING-LNPs kill metastatic cancer cells in the circulation by activating NK cells.                                                     | Renca mouse model       | 41 |
|          | SHP-1/Cbl LNPs | siRNA Lipid nanoparticle   | Multi-targeting, high specificity, and stability | Nanoparticles enhance the ability of NK cells to kill cancer cells by silencing the expression of SHP-1, Cb1-b, and c-Cb1 in NK cells. | 221.Cw4-HLA mouse model | 42 |
|          | SeNPs          | Inorganic nanoparticle     | Biocompatibility, enzymes and ROS-responsive     | The oxidative metabolites produced by SeNPs enhance tumor chemotherapy immunotherapy by activating NK cells.                           | MDA-MB-231 mouse model  | 43 |

|     |                 |                            |                                                                                |                                                                                                                                         |                    |    |
|-----|-----------------|----------------------------|--------------------------------------------------------------------------------|-----------------------------------------------------------------------------------------------------------------------------------------|--------------------|----|
| DCs | Pem/Se          | Inorganic nanoparticle     | Safety and ROS-responsive                                                      | The selenite produced by Pem/Se can activate NK cells <i>via</i> inhibiting HLA-E.                                                      | A549 mouse model   | 44 |
|     | CC-6td NP       | Self-assembly nanoparticle | Carrier-free, no adverse immune reactions, and                                 | CC-6td NP can simultaneously regulate the anti-tumor cascade immune response initiated by DCs.                                          | MC38 mouse model   | 45 |
|     | mHMnO-Dox       | Inorganic nanoparticle     | Homologous targeting and biocompatibility                                      | The release of Mn <sup>2+</sup> from mHMnO-Dox promotes DCs maturation and induces anti-tumor immune response by activating cGAS-STING. | 4T1 mouse model    | 46 |
|     | aDCM@PLGA/RAP A | Polymer nanoparticle       | Homologous adhesion, crossing the blood-brain barrier.                         | aDCM@PLGA/RAPA stimulate the maturation of DCs and activate the infiltration of T cells, thereby inducing anti-tumor immunity.          | C6-LUC mouse model | 47 |
|     | PAG/BTZ         | Polymer nanoparticle       | pH-responsive, high loading content, and prolonging the blood circulation time | The BTZ released by PAG/BTZ is responsible for inducing ICD, while AG is responsible for promoting the maturation of                    | 4T1 mouse model    | 48 |
|     |                 |                            |                                                                                |                                                                                                                                         |                    |    |

|                       |                 |                        |                                                                           |                                                                                                                                                    |                                   |
|-----------------------|-----------------|------------------------|---------------------------------------------------------------------------|----------------------------------------------------------------------------------------------------------------------------------------------------|-----------------------------------|
|                       |                 |                        | DCs, thereby better inducing anti-tumor immune responses.                 |                                                                                                                                                    |                                   |
|                       | RNA-NPs         | Composite nanoparticle | Condense RNA and penetrate the negatively charged cell membrane           | RNA-NPs promote the maturation of DCs to initiate anti-tumor immune responses.                                                                     | CT26 mouse model 49               |
|                       | Ru@ICG BLZ NPs  | Inorganic nanoparticle | Responsive release and low toxicity                                       | Ru@ICG-BLZ NPs can repolarize TAMs into M1 phenotype and eliminate tumor cells through phototherapy.                                               | CT26 mouse model 50               |
| Non-specific targeted | Cur-CSNPs       | Inorganic nanoparticle | ROS-responsive and NIR-responsive                                         | Cur-CSNPs downregulate the expression of HIF-1 and promote polarization of M2 macrophages towards M1 macrophages.                                  | 4T1 and MDA-MB-231 mouse model 51 |
|                       | Lipo Zol/IR NPs | Lipid nanoparticle     | Targeting the tumor site, large pore size, volume, and high surface areas | Lipo Zol/IR NPs release Zol in TEM and were selectively engulfed by TAMs, causing them to repolarize from the immunosuppressed M2 phenotype to the | 4T1 mouse model 52                |

|                                         |                            |                                                                               |                                                                     |                                                                                                                                       |                    |    |
|-----------------------------------------|----------------------------|-------------------------------------------------------------------------------|---------------------------------------------------------------------|---------------------------------------------------------------------------------------------------------------------------------------|--------------------|----|
|                                         |                            |                                                                               |                                                                     | immunostimulated M1 phenotype.                                                                                                        |                    |    |
| IL@H-PP                                 | Inorganic nanoparticle     | Stability and high photothermal conversion efficiency                         | and high conversion                                                 | IL@H-PP can induce an increase in ROS in TAMs by releasing copper ions, thereby repolarizing them to an M1 phenotype.                 | 4T1 mouse model    | 53 |
| LT-NPs                                  | Self-assembly nanoparticle | Low toxicity, high drug loading rate, and specifically cleaved in tumor cells | and high drug loading rate, and specifically cleaved in tumor cells | LT-NPs can effectively stimulate the maturation of DCs and initiate anti-tumor immune responses.                                      | CT26 mouse model   | 54 |
| iPS-MnO <sub>2</sub> @Ce6               | Inorganic nanoparticle     | Biocompatibility and high photo/thermal stability                             | and high photo/thermal stability                                    | iPS-MnO <sub>2</sub> @Ce6 promote the maturation of DCs, thereby activating T cells and NK cells, and inducing immune responses       | Lewis mouse model  | 55 |
| <sup>LY</sup> iCluster <sub>siRNA</sub> | Polymer nanoparticle       | pH-responsive and avoiding gene degradation                                   | and avoiding gene degradation                                       | <sup>LY</sup> iCluster <sub>siRNA</sub> significantly increased the permeation of CD8 <sup>+</sup> T cells and inhibited tumor growth | Panc02 mouse model | 56 |

PHNPs@DPA-S-S-BSA-MA@3-MA, 3-MA loaded porous hollow iron oxide nanoparticles modified with mannose; IL-12/ $\alpha$ -TOS loaded TRN, TME-responsive nanocarriers loaded with IL-12 or  $\alpha$ -TOS; TNPs, tumor-responsive therapeutic nanoparticles for co-delivery of IL-12 and doxorubicin; BLZ945/Sel NPs, BLZ945 and selumetinib loaded supramolecular nanoparticles; P/T@MM NPs, TMP195 loaded macrophage membrane-coated biomimetic nanoparticles; R848@LNPs, R848@LNPs labeled with 5(6)-carboxyfluorescein; MIX-NPs, twin-like

charge-switchable nanoparticles; tLyp1-CH NPs, tLyp1 peptide coupled hybrid nanoparticles; Cur NPs, curcumin nanoparticles; IR780/Met NPs, IR780 and metformin loaded nanoplatfrom; SHP-1/Cbl siRNA LNPs, lipid-based nanoparticles for SHP-1 and Cbl siRNA delivery

## References

1. Cavalcante RMS, Ishikawa U, Silva ES, Silva AA, Araújo AA, Cruz LJ, et al. STAT3/NF- $\kappa$ B signalling disruption in M2 tumour-associated macrophages is a major target of PLGA nanocarriers/PD-L1 antibody immunomodulatory therapy in breast cancer. *Brit J Pharmacol* 2021;**178**:2284-304.
2. Li K, Lu L, Xue CC, Liu J, He Y, Zhou J, et al. Polarization of tumor-associated macrophage phenotype porous hollow iron nanoparticles for tumor immunotherapy *in vivo*. *Nanoscale* 2020;**12**:130-44.
3. Liu Y, Liang S, Jiang DD, Gao T, Fang YX, Fu SL, et al. Manipulation of TAMs functions to facilitate the immune therapy effects of immune checkpoint antibodies. *J Control Release* 2021;**336**:621-34.
4. Yang LN, Sun J, Liu Q, Zhu RR, Yang QN, Hua JH, et al. Synergetic functional nanocomposites enhance immunotherapy in solid tumors by remodeling the immunoenvironment. *Adv Sci* 2019;**6**:1802012.
5. Wan YF, Yu WJ, Li JM, Peng N, Ding X, Wang YL, et al. Multi-functional carboxymethyl chitin-based nanoparticles for modulation of tumor-associated macrophage polarity. *Carbohydr Polym* 2021;**267**:118245.
6. Li TS, Liu ZH, Fu X, Chen YQ, Zhu SL, Zhang J. Co-delivery of interleukin-12 and doxorubicin loaded nano-delivery system for enhanced immunotherapy with polarization toward M1-type macrophages. *Eur J Pharm Biopharm* 2022;**177**:175-83.
7. Ramesh A, Brouillard A, Kumar S, Nandi D, Kulkarni A. Dual inhibition of CSF1R and MAPK pathways using supramolecular nanoparticles enhances macrophage immunotherapy. *Biomaterials* 2020;**227**:119559.

8. Ramesh A, Malik V, Ranjani HA, Smith H, Kulkarni AA. Rational combination of an immune checkpoint inhibitor with CSF1R inhibitor-loaded nanoparticle enhances anticancer efficacy. *Drug Deliv Transl Re* 2021;**11**:2317-27.
9. Yue YL, Li FF, Li Y, Wang YZ, Guo XJ, Cheng ZX, et al. Biomimetic nanoparticles carrying a repolarization agent of tumor-associated macrophages for remodeling of the inflammatory microenvironment following photothermal therapy. *Acs Nano* 2021;**15**:15166-79.
10. Figueiredo P, Lepland A, Scodeller P, Fontana F, Torrieri G, Tiboni M, et al. Peptide-guided resiquimod-loaded lignin nanoparticles convert tumor-associated macrophages from M2 to M1 phenotype for enhanced chemotherapy. *Acta Biomater* 2021;**133**:231-43.
11. Costa da Silva M, Breckwoldt MO, Vinchi F, Correia MP, Stojanovic A, Thielmann CM, et al. Iron induces anti-tumor activity in tumor-associated macrophages. *Front Immunol* 2017;**8**:1479.
12. Zhao M, Li J, Liu JW, Xu MX, Ji HR, Wu SW, et al. Charge-switchable nanoparticles enhance cancer immunotherapy based on mitochondrial dynamic regulation and immunogenic cell death induction. *J Control Release* 2021;**335**:320-32.
13. Yang LN, Li F, Cao YS, Liu Q, Jing GX, Niu JT, et al. Multifunctional silica nanocomposites prime tumoricidal immunity for efficient cancer immunotherapy. *J Nanobiotechnol* 2021;**19**:328.
14. Zeng WW, Yu M, Chen T, Liu YQ, Yi YF, Huang CY, et al. Polypyrrole nanoenzymes as tumor microenvironment modulators to reprogram macrophage and potentiate immunotherapy. *Adv Sci (Weinh)* 2022;**9**:2201703.
15. Yu YK, Li TX, Ou MT, Luo R, Chen HZ, Ren H, et al. OX40L-expressing M1-like macrophage exosomes for cancer immunotherapy. *J Control Release* 2024;**365**:469-79.
16. Lin YX, Wang Y, Ding JX, Jiang AP, Wang J, Yu MA, et al. Reactivation of the tumor suppressor PTEN by mRNA nanoparticles



enhances antitumor immunity in preclinical models. *Sci Transl Med* 2021;**13**:eaba9772.

17. Wang TT, Zhang H, Han YB, Zheng Q, Liu HH, Han MX, et al. Reversing T cell dysfunction to boost glioblastoma immunotherapy by paroxetine-mediated GRK2 inhibition and blockade of multiple checkpoints through biomimetic nanoparticles. *Adv Sci* 2023;**10**:e2204961.
18. Ren H, Yong JH, Yang QQ, Yang Z, Liu ZY, Xu Y, et al. Self-assembled FeS-based cascade bioreactor with enhanced tumor penetration and synergistic treatments to trigger robust cancer immunotherapy. *Acta Pharm Sin B* 2021;**11**:3244-61.
19. Chen Q, Hu QY, Dukhovlina E, Chen GJ, Ahn S, Wang C, et al. Photothermal therapy promotes tumor infiltration and antitumor activity of CAR T cells. *Adv Mater* 2019;**31**:e1900192.
20. Zhang YX, Zhao YY, Shen JZ, Sun X, Liu Y, Liu H, et al. Nanoenabled modulation of acidic tumor microenvironment reverses anergy of infiltrating T cells and potentiates anti-PD-1 therapy. *Nano Lett* 2019;**19**:2774-83.
21. Lu Y, Li LH, Du JW, Chen JL, Xu XY, Yang XF, et al. Immunotherapy for tumor metastasis by artificial antigen-presenting cells via targeted microenvironment regulation and T-cell activation. *Acs Appl Mater Inter* 2021;**13**:55890-901.
22. Li ZT, Deng YY, Sun HH, Tan CX, Li HM, Mo FY, et al. Redox modulation with a perfluorocarbon nanoparticle to reverse Treg-mediated immunosuppression and enhance anti-tumor immunity. *J Control Release* 2023;**358**:579-90.
23. Ou W, Thapa RK, Jiang LY, Soe ZC, Gautam M, Chang JH, et al. Regulatory T cell-targeted hybrid nanoparticles combined with immuno-checkpoint blockage for cancer immunotherapy. *J Control Release* 2018;**281**:84-96.
24. He SQ, Wang LL, Wu DX, Tong F, Zhao H, Li HM, et al. Dual-responsive supramolecular photodynamic nanomedicine with activatable

immunomodulation for enhanced antitumor therapy. *Acta Pharm Sin B* 2024;**14**:765-80.

25. Ou W, Jiang L, Thapa RK, Soe ZC, Poudel K, Chang JH, et al. Combination of NIR therapy and regulatory T cell modulation using layer-by-layer hybrid nanoparticles for effective cancer photoimmunotherapy. *Theranostics* 2018;**8**:4574-90.
26. Hossain DMS, Panda AK, Chakrabarty S, Bhattacharjee P, Kajal K, Mohanty S, et al. MEK inhibition prevents tumour-shed transforming growth factor- $\beta$ -induced T-regulatory cell augmentation in tumour milieu. *Immunology* 2015;**144**:561-73.
27. Zhang N, Liu SN, Shi SY, Chen YT, Xu FW, Wei XH, et al. Solubilization and delivery of Ursolic-acid for modulating tumor microenvironment and regulatory T cell activities in cancer immunotherapy. *J Control Release* 2020;**320**:168-78.
28. Chen HW, Luan X, Paholak HJ, Burnett JP, Stevers NO, Sansanaphongpricha K, et al. Depleting tumor-associated Tregs via nanoparticle-mediated hyperthermia to enhance anti-CTLA-4 immunotherapy. *Nanomedicine-Uk* 2020;**15**:77-92.
29. Plebanek MP, Bhaumik D, Bryce PJ, Thaxton CS. Scavenger receptor type B1 and lipoprotein nanoparticle inhibit myeloid-derived suppressor cells. *Mol Cancer Ther* 2018;**17**:686-97.
30. Zhang T, Xiong HG, Ma XB, Gao Y, Xue P, Kang YJ, et al. Supramolecular tadalafil nanovaccine for cancer immunotherapy by alleviating myeloid-derived suppressor cells and heightening immunogenicity. *Small Methods* 2021;**5**:e2100115.
31. Zuo HQ, Hou YC, Yu YJ, Li ZQ, Liu HX, Liu C, et al. Circumventing myeloid-derived suppressor cell-mediated immunosuppression using an oxygen-generated and -economized nanoplatform. *Acs Appl Mater Inter* 2020;**12**:55723-36.
32. Xia CY, Li M, Ran GY, Wang XH, Lu ZZ, Li T, et al. Redox-responsive nanoassembly restrained myeloid-derived suppressor cells recruitment through autophagy-involved lactate dehydrogenase A silencing for enhanced cancer immunochemotherapy. *J Control Release*

2021;**335**:557-74.

33. Zhang HY, Chen LY, Zhao Y, Luo NC, Shi JB, Xu SJ, et al. Relaxin-encapsulated polymeric metformin nanoparticles remodel tumor immune microenvironment by reducing CAFs for efficient triple-negative breast cancer immunotherapy. *Asian J Pharm Sci* 2023;**18**:100796.
34. He Y, Wu SY, Yuan YB, Sun YC, Ai QJ, Zhou RQ, et al. Remodeling tumor immunosuppression with molecularly imprinted nanoparticles to enhance immunogenic cell death for cancer immunotherapy. *J Control Release* 2023;**362**:44-57.
35. Zheng F, Luo YJ, Liu YQ, Gao YY, Chen WY, Wei K. Nano-baicalein facilitates chemotherapy in breast cancer by targeting tumor microenvironment. *Int J Pharmaceut* 2023;**635**:122778.
36. Chen YN, Hu MR, Wang SW, Wang Q, Lu HY, Wang F, et al. Nano-delivery of salvianolic acid B induces the quiescence of tumor-associated fibroblasts *via* interfering with TGF- $\beta$ 1/Smad signaling to facilitate chemo- and immunotherapy in desmoplastic tumor. *Int J Pharm* 2022;**623**:121953.
37. Pan JX, Lai Y, Zhang SA, Zhang HJ, Shan YM, Huang LJ, et al. Self-adaptive nanoregulator to mitigate dynamic immune evasion of pancreatic cancer. *Adv Mater* 2023;**35**:e2305798.
38. Zang SY, Huang KX, Li JX, Ren KB, Li T, He X, et al. Metabolic reprogramming by dual-targeting biomimetic nanoparticles for enhanced tumor chemo-immunotherapy. *Acta Biomater* 2022;**148**:181-93.
39. Sun XS, Xu XX, Wang J, Zhang XY, Zhao ZT, Liu XC, et al. Acid-switchable nanoparticles induce self-adaptive aggregation for enhancing antitumor immunity of natural killer cells. *Acta Pharm Sin B* 2023;**13**:3093-105.

40. Lian GY, Wan Y, Mak TS, Wang QM, Zhang J, Chen J, et al. Self-carried nanodrug (SCND-SIS3): a targeted therapy for lung cancer with superior biocompatibility and immune boosting effects. *Biomaterials* 2022;**288**:121730.
41. Nakamura T, Sasaki S, Sato Y, Harashima H. Cancer immunotherapy with lipid nanoparticles loaded with a stimulator of interferon genes agonist against renal tumor lung metastasis. *Pharmaceutics* 2023;**16**:31.
42. Biber G, Sabag B, Raiff A, Ben-Shmuel A, Puthenveetil A, Benichou JIC, et al. Modulation of intrinsic inhibitory checkpoints using nano-carriers to unleash NK cell activity. *EMBO Mol Med* 2022;**14**:e14073.
43. Wei ZY, Yi Y, Luo Z, Gong XY, Jiang YX, Hou DY, et al. Selenopeptide nanomedicine activates natural killer cells for enhanced tumor chemoimmunotherapy. *Adv Mater* 2022;**34**:e2108167.
44. Pan SJ, Li TY, Tan YZ, Xu HP. Selenium-containing nanoparticles synergistically enhance Pemetrexed&NK cell-based chemoimmunotherapy. *Biomaterials* 2022;**280**:121321.
45. Qin XH, Zhang MZ, Zhao ZP, Du Q, Li Q, Jiang Y, et al. A carrier-free photodynamic nanodrug to enable regulation of dendritic cells for boosting cancer immunotherapy. *Acta Biomater* 2022;**147**:366-76.
46. Wang P, Wang YF, Li HM, Wang MM, Wang Y, Wang XF, et al. A homologous-targeting cGAS-STING agonist multimodally activates dendritic cells for enhanced cancer immunotherapy. *Acta Biomater* 2024;**177**:400-13.
47. Ma XY, Kuang L, Yin Y, Tang L, Zhang Y, Fan Q, et al. Tumor-antigen activated dendritic cell membrane-coated biomimetic nanoparticles with orchestrating immune responses promote therapeutic efficacy against glioma. *ACS Nano* 2023;**17**:2341-55.
48. Xu XD, Wang R, Li DD, Xiang JJ, Zhang W, Shi XY, et al. Guanidine-modified nanoparticles as robust BTZ delivery carriers and

activators of immune responses. *J Control Release* 2023;**357**:310-8.

49. Su LH, Pan W, Li XX, Zhou XY, Ma XP, Min YZ. Utilizing chemotherapy-induced tumor RNA nanoparticles to improve cancer chemoimmunotherapy. *Acta Biomater* 2023;**158**:698-707.
50. Liu YN, Wen YY, Chen X, Zhu XF, Yu QQ, Gong YC, et al. Inflammation-responsive functional Ru nanoparticles combining a tumor-associated macrophage repolarization strategy with phototherapy for colorectal cancer therapy. *J Mater Chem B* 2019;**7**:6210-23.
51. Zhang LJ, Huang R, Shen YW, Liu J, Wu Y, Jin JM, et al. Enhanced anti-tumor efficacy by inhibiting HIF-1 $\alpha$  to reprogram TAMs core-satellite upconverting nanoparticles with curcumin mediated photodynamic therapy. *Biomater Sci-Uk* 2021;**9**:6403-15.
52. Jian H, Wang XB, Song PP, Wu XQ, Zheng RX, Wang YJ, et al. Tumor microcalcification-mediated relay drug delivery for photodynamic immunotherapy of breast cancer. *Acta Biomater* 2022;**140**:518-29.
53. Tong F, Hu HL, Xu YY, Zhou Y, Xie R, Lei T, et al. Hollow copper sulfide nanoparticles carrying ISRIB for the sensitized photothermal therapy of breast cancer and brain metastases through inhibiting stress granule formation and reprogramming tumor-associated macrophages. *Acta Pharm Sin B* 2023;**13**:3471-88.
54. Choi J, Shim MK, Yang S, Hwang HS, Cho H, Kim J, et al. Visible-light-triggered prodrug nanoparticles combine chemotherapy and photodynamic therapy to potentiate checkpoint blockade cancer immunotherapy. *ACS Nano* 2021;**15**:12086-98.
55. Liu YL, Yang JX, Liu B, Cao W, Zhang JP, Yang YM, et al. Human iPS cells loaded with MnO<sub>2</sub>-based nanoprobe for photodynamic and simultaneous enhanced immunotherapy against cancer. *Nanomicro Lett* 2020;**12**:127.
56. Wang Y, Gao ZX, Du XJ, Chen SB, Zhang WC, Wang JL, et al. Co-inhibition of the TGF- $\beta$  pathway and the PD-L1 checkpoint by

pH-responsive clustered nanoparticles for pancreatic cancer microenvironment regulation and anti-tumor immunotherapy. *Biomater Sci-Uk* 2020;**8**:5121-32.
